**Title: Psychosocial experiences modulate asthma-associated genes through gene-environment interactions**

**Authors:** Justyna A. Resztak<sup>1</sup>, Allison K. Farrell<sup>2</sup>, Henriette E. Mair-Meijers<sup>1</sup>, Adnan Alazizi<sup>1</sup>, Xiaoquan Wen<sup>3</sup>, Derek E. Wildman<sup>4</sup>, Samuele Zilioli<sup>5,6</sup>, Richard B. Slatcher<sup>5</sup>, Roger Pique-Regi<sup>1,7\*</sup>, Francesca Luca<sup>1,7\*</sup>

**Affiliations:**

<sup>1</sup>Center for Molecular Medicine and Genetics, Wayne State University, Detroit, MI

<sup>2</sup>Department of Psychology, Miami University, Oxford, OH

<sup>3</sup>Department of Biostatistics, University of Michigan, Ann Arbor, MI

<sup>4</sup>College of Public Health, University of South Florida, Tampa, FL

<sup>5</sup>Department of Psychology, Wayne State University, Detroit, MI

<sup>6</sup>Department of Family Medicine and Public Health Sciences, Wayne State University, Detroit, MI

<sup>7</sup>Department of Obstetrics and Gynecology, Wayne State University, Detroit, MI

\*Correspondence should be addressed: [fluca@wayne.edu](mailto:fluca@wayne.edu), [rpique@wayne.edu](mailto:rpique@wayne.edu)

**Abstract:**

Social interactions and the overall psychosocial environment have a demonstrated impact on health, particularly for people living in disadvantaged urban areas. Here we investigated the effect of psychosocial experiences on gene expression in peripheral blood immune cells of 251 children with asthma in Metro Detroit. Using RNA-sequencing and a new machine learning approach, we identified transcriptional signatures of 20 variables including psychosocial factors, blood cell composition and asthma symptoms. Importantly, we found 174 genes causally associated with asthma that are regulated by psychosocial factors, and 349 significant gene-environment interactions. These results demonstrate that social environments modulate the causal link between immune gene expression and asthma risk.

## Main Text:

### Introduction

Psychosocial experiences have long been recognized to affect human health<sup>1</sup>. Intrapersonal processes (e.g. emotionality<sup>2,3</sup>, interpersonal social relationships<sup>4,5</sup>) and broader structural environments (e.g. neighborhood quality and socioeconomic status (SES)<sup>6</sup>) are all associated with the morbidity and severity of diseases such as asthma<sup>7</sup>, cancer<sup>8</sup>, cardiovascular disease<sup>9</sup>, as well as mortality rates<sup>10,11</sup>. Asthma is a chronic inflammatory disease of the respiratory tract that disproportionately affects children<sup>12</sup>. It is one of the costliest pediatric health conditions<sup>13</sup>, and a leading cause of school absenteeism<sup>14</sup>. Financially struggling cities, such as Detroit, are at an especially high risk for asthma morbidity and mortality<sup>15</sup>. While environmental and genetic factors lead to the development of asthma and affect the health of children with asthma<sup>16-18</sup>, psychosocial stress is a critical factor contributing to asthma severity<sup>19-23</sup>. Understanding the biological pathways underlying these associations is crucial to strengthen the causal claims linking psychosocial experiences and health.

The growing field of social genomics investigates how various dimensions of a person's social and psychological environment influence gene expression<sup>24-28</sup>. There is ample evidence for links between gene expression in blood and three major categories of psychosocial experiences: socioeconomic status (SES)<sup>29</sup>, social relationships<sup>30-32</sup> and emotionality<sup>33,34</sup>. Beyond single gene analyses, previous studies in this area<sup>24-26</sup> identified a pattern of differentially expressed genes referred to as the *conserved transcriptional response to adversity* (CTRA). The CTRA is characterized by increased expression of genes involved in inflammation and decreased expression of genes involved in type I interferon antiviral responses and IgG1 antibody synthesis<sup>35</sup>. However, these studies investigated a limited set of psychosocial experiences and did not resolve whether these pathways are causally linked to health outcomes or rather a consequence of disease status.

Several approaches have been developed for investigating the role of gene expression in complex trait variation<sup>36-39</sup>. Most recently, Transcriptome Wide Association Studies (TWAS) integrated genetic effects on gene expression and on complex traits to establish causal links between a gene and a phenotype<sup>40</sup>. For example, through this approach *TLR6* gene has been causally linked to early onset asthma risk<sup>41</sup>. However, because very few studies of genetic regulation of gene expression (expression quantitative trait loci, eQTL mapping) in humans have included

comprehensive information on psychosocial exposures, no study to date has been able to determine the causal relationship between psychosocial experiences, gene expression and asthma. This study aims at filling this gap by combining genetic and well-characterized psychosocial data from a cohort of children with asthma living in Metro Detroit (Figure 1a).

The Asthma in the Lives Of Families Today (ALOFT) project was established in 2009 to identify the behavioral and biological pathways through which family social environments impact youth with asthma. To analyze the relationship between psychosocial experiences, asthma and transcriptional regulation, we investigated genome-wide gene expression (RNA-seq) for 251 youth participating in the ALOFT study. For 119 participants, we also collected 53 psychosocial and biological variables (Table S2, Fig. S1). Measures of psychosocial experiences were grouped into five clusters, indicating SES, social relationship functioning, and emotionality. Psychosocial experiences were captured through subjective and objective measures (e.g. negative affect assessed from daily diaries and recorded audio, respectively), as well as global and daily measures.

## Results

### Psychosocial factors and asthma alter the transcriptome

To de-noise and impute psychosocial effects on gene expression for the entire cohort of 251 participants, we developed a new machine learning approach based on generalized linear models with elastic net regularization (GLMnet<sup>42</sup>) and cross-validation. Using this approach we derived transcriptional signatures that represent the portion of the transcriptome that correlates with each psychosocial factor. Analogous methods have been adopted to define transcriptional signatures of T-cell exhaustion in aging<sup>43</sup> and survival in cancer<sup>44</sup>, but have not been previously used for psychosocial factors. We identified significant transcriptional signatures for 32 out of 53 variables (Figure 1b-e, Table S6). We used an independent longitudinal dataset to validate the transcriptional signatures. We considered the changes in the observed variable between two time points ( $\geq 1$  year) and compared it to the longitudinal changes in the transcriptional signature. Note that the transcriptional signature is imputed for the second time point from gene expression samples that are not included in the training set. We found significant correlations in the observed and imputed changes for the majority of variables (Spearman correlation  $p$ -value $<0.05$ ; e.g. Fig 1f, Table S7).

Transcriptional signatures of the SES measures showed a strong overlap with each other (Fig. 2a), suggesting that they may have very similar molecular effects or measure the same factors. However, we also saw correlations across all three variable categories. For example, subjective SES was significantly correlated with objective parental responsiveness, family conflict, and self-reported self-disclosure, which is the extent to which the youths talk about their thoughts and feelings ( $r=-0.26$ ,  $p=0.004$ ,  $r=0.25$ ,  $p=0.006$ ,  $r=0.53$ ,  $p=6.8 \times 10^{-10}$ , respectively). These results align with past work showing low SES is a risk factor for poor family functioning<sup>45</sup>. Measured psychosocial factors were also associated with interindividual variation in gene expression for several genes. For example, perceived responsiveness and self-disclosure were associated with changes in gene expression for 143 and 3279 genes, respectively (Table S5).

When we correlated transcriptional signatures of asthma severity with those for psychosocial variables, we observed overlap with SES and social relationships, but not emotionality. In particular, we found significant positive correlations between the transcriptional signatures of lung functioning (percent-predicted FEV1) and psychosocial measures of self-disclosure ( $r=0.30$ ,  $p=0.001$ ), objective maternal responsiveness ( $r=-0.19$ ,  $p=0.04$ ), subjective SES ( $r=0.25$ ,  $p<0.05$ ), and percent unoccupied properties in the neighborhood ( $r=0.27$ ,  $p=0.003$ ). These results provide a potential mechanism through gene expression changes in leukocytes for previously reported links between parent-child relationship quality and asthma symptoms<sup>46,47</sup>, as well as SES and asthma symptoms<sup>48,49</sup>. Past research has found emotionality to be a strong predictor of asthma severity<sup>50</sup>. Here we found that the transcriptional signature of self-disclosure was also significantly associated with other measures of asthma, such as nightly asthma symptoms ( $r=0.22$ ,  $p=0.02$ ) and asthma severity ( $r=-0.38$ ,  $p<0.001$ ), echoing the large body of work on the importance of self-disclosure for health<sup>51</sup>.

Notably, the transcriptional signatures of blood composition were also associated with asthma symptoms, with a positive correlation for proportion of lymphocytes and negative correlation for proportion of neutrophils (Fig. S7). We hypothesized that transcriptional changes associated with blood composition mediated the correlations between psychosocial experiences and asthma outcomes. Using mediation analysis, we found significant ( $p<0.05$ ) paths through all three blood composition signatures, such that, at the molecular level, self-disclosure association with higher pulmonary function could be partially explained by an increase in the proportions of monocytes and neutrophils and reduced proportions of lymphocytes (Figure 2b).

### **Genetic interactions with psychosocial factors affect gene regulation**

To directly investigate whether transcriptional signatures associated with negative psychosocial experiences contribute to inter-individual variation in asthma risk, we used expression quantitative trait locus (eQTL) mapping combined with transcriptome-wide association analysis (TWAS)<sup>40</sup>. TWAS uses eQTLs as instrumental variables to causally link gene expression to phenotypes. To examine local genetic effects on leukocyte gene expression, we performed cis-eQTL mapping and identified 8590 genes (eGenes) with at least one eQTL (10% FDR). These eGenes were enriched in GTEx whole blood eGenes<sup>52</sup> (Fisher's test OR=3.2, p-value <  $2.2 \times 10^{-16}$ ), but we also identified additional 1,792 eGenes that were not detected by GTEx in whole blood. These newly-identified genetic effects may be due to limited power in eQTL studies and/or differences between our cohort and GTEx samples in cell type composition, ancestry, age, psychosocial environment, and/or the asthma status.

We used a new method we recently developed for Probabilistic TWAS analysis (PTWAS)<sup>53</sup>, which improves upon previous TWAS methods by ensuring only strong instrumental variables are used, and is designed to allow for validating the causality assumption (see Methods). We identified 2,806 eGenes in the GTEx dataset that were causally associated with asthma and allergic diseases (hay fever, eczema and allergic rhinitis) (5% FDR). Of these, 443 were eGenes in our dataset. Here we interrogated whether these causal genetic effects can be modulated by psychosocial factors through gene-environment interactions. To examine the genotype-by-environment effects of psychosocial experiences and blood composition on gene expression, we used the imputed transcriptional signatures for the entire cohort of 251 individuals. In addition to augmenting our sample size, we argue that these transcriptional signatures may better capture the environmental effects on the state of the cells at the molecular level (i.e., after denoising), compared to the observed variables. This is because the observed variable has high levels of noise, and the measured value may not reflect the true biological effect. Therefore, we used the predicted values for all participants, including those for whom the variable was directly measured (denoising). This is similar to the context eQTL approach<sup>54</sup> that uses other genes as a proxy variable for the environment, but here the "context" is more easily interpretable because it is defined by a transcriptional signature associated with a specific psychosocial factor. Similarly, cell type composition imputed from gene expression was used to map cell type interaction QTLs for 43 cell type-tissue combinations in the GTEx v8 dataset<sup>55</sup>.

For each of the eGenes identified in our dataset, we tested the lead eQTL for an interaction effect (see Methods) with any of the transcriptional signatures. We discovered 349 significant interaction eQTLs across 136 unique genes (10% FDR; Figure 3a, File S7). We found interaction eQTLs for all four blood composition signatures (proportion of lymphocytes, neutrophils, monocytes and eosinophils with 83, 65, 27 and 25 GxE interactions, respectively), which represent cell-type-specific eQTLs (57% of all GxE eQTLs). 93 of the 109 blood-interacting eGenes (85%) were also identified as genes with interaction eQTLs with cell type composition in GTEx whole blood<sup>55</sup>. We identified 126 GxE interaction effects on gene expression with psychosocial experiences across 78 genes, including self-disclosure (48 genes), subjective socio-economic status (40 genes), and objective maternal responsiveness (16 genes) (Supplementary File S5). These only partially overlapped (77%) GxE effects observed for blood composition, and included interactions specific to psychosocial factors (Fig. 3c). To evaluate whether the interactions with psychosocial experiences may be mediated by cell composition, we repeated the GxE mapping after correcting for blood cell composition. We observed 130 significant GxE effects (10% FDR) after removing the effect of blood composition differences (Supplementary File S6).

To validate these GxE results we explored the overlap between the GxE genes and previously published datasets that measured interactions with different environments (N=136 genes, see Methods and Supplementary text). We found that 94% of our GxE genes replicated in other datasets of GxE in gene expression ( $p < 0.05$ ). 63 interaction eGenes for psychosocial experiences overlapped with interaction eGenes in response to pathogens<sup>56-59</sup>. This result may indicate that negative psychosocial experiences lead to genotype-specific adverse health effects by influencing the same immune pathways activated by infections. Furthermore, psychosocial experiences may modify the individual response to pathogens and affect health outcomes.

### **Risk for asthma is modulated by GxE**

We then investigated whether the risk for asthma is modulated through psychosocial experiences (E), and/or GxE effects. Among the genes causally linked to asthma or allergic disease risk by PTWAS, expression of 174 genes was modulated by psychosocial environments, including self-disclosure (124 genes), SES (104 genes), family conflict (30 genes), percent unoccupied houses in the neighborhood (27 genes), parent's income (19 genes), maternal responsiveness (17 genes), negative affect (e.g. feeling sad or angry, 11 genes), child-reported conflict with parent (9 genes) and percent  $\geq$ fair houses in the neighborhood (2 genes) (File S7). The genetic effect on

gene expression is modulated by psychosocial factors through GxE for seven genes causally implicated in asthma (4 genes) and allergic diseases (4 genes) (Figs. 3cdef, S11-12). For example, higher expression of the Exocyst Complex Component 3 gene (*EXOC3*) is associated with an increased risk of asthma. We found that self-disclosure, which is the extent to which the youths talk about their thoughts and feelings, increases expression of this gene only for individuals carrying at least one copy of the T allele at rs5865330 (Fig. 3e). The genetic effect was even more pronounced in the highest tertile of self-disclosure (Fig. 3e inset). Lower expression of the Growth Arrest Specific 8 gene (*GAS8*) is associated with an increased risk of asthma. The A allele at rs12922757 increases expression of this gene only in individuals with perceived high socio-economic status, thus reducing the risk of disease (Fig. 3f). A similar effect, and in the same direction is found for *GAS8* and higher self-disclosure (Fig S11-12).

## Discussion

In this study we collected a unique dataset with genome-wide gene expression paired with extensive and accurate assessment of each participant's biological and psychosocial functioning, across a variety of domains known or likely to be relevant for asthma. We developed a new approach to de-noise and impute the transcriptional signatures of psychosocial experiences in peripheral blood. Longitudinal data collected on the same individuals validated the transcriptional signatures imputed on an unobserved later time point mirroring the changes on phenotype. This demonstrates that the molecular signature of psychosocial exposures on immune cells can track changes over time and can be used to analyze cohorts where these variables are not available. Here, we show that these altered gene expression immune profiles may in turn exacerbate asthma symptoms in children living in inner cities, who are exposed to riskier psychosocial environments. Using human genetics tools we established that psychosocial factors can modulate the causal genetic effects between gene expression and asthma. Importantly, our results demonstrate that psychosocial factors, such as self-disclosure and socio-economic status, modulate genetic risk of asthma and other allergic diseases through altered peripheral blood gene expression.



Figures

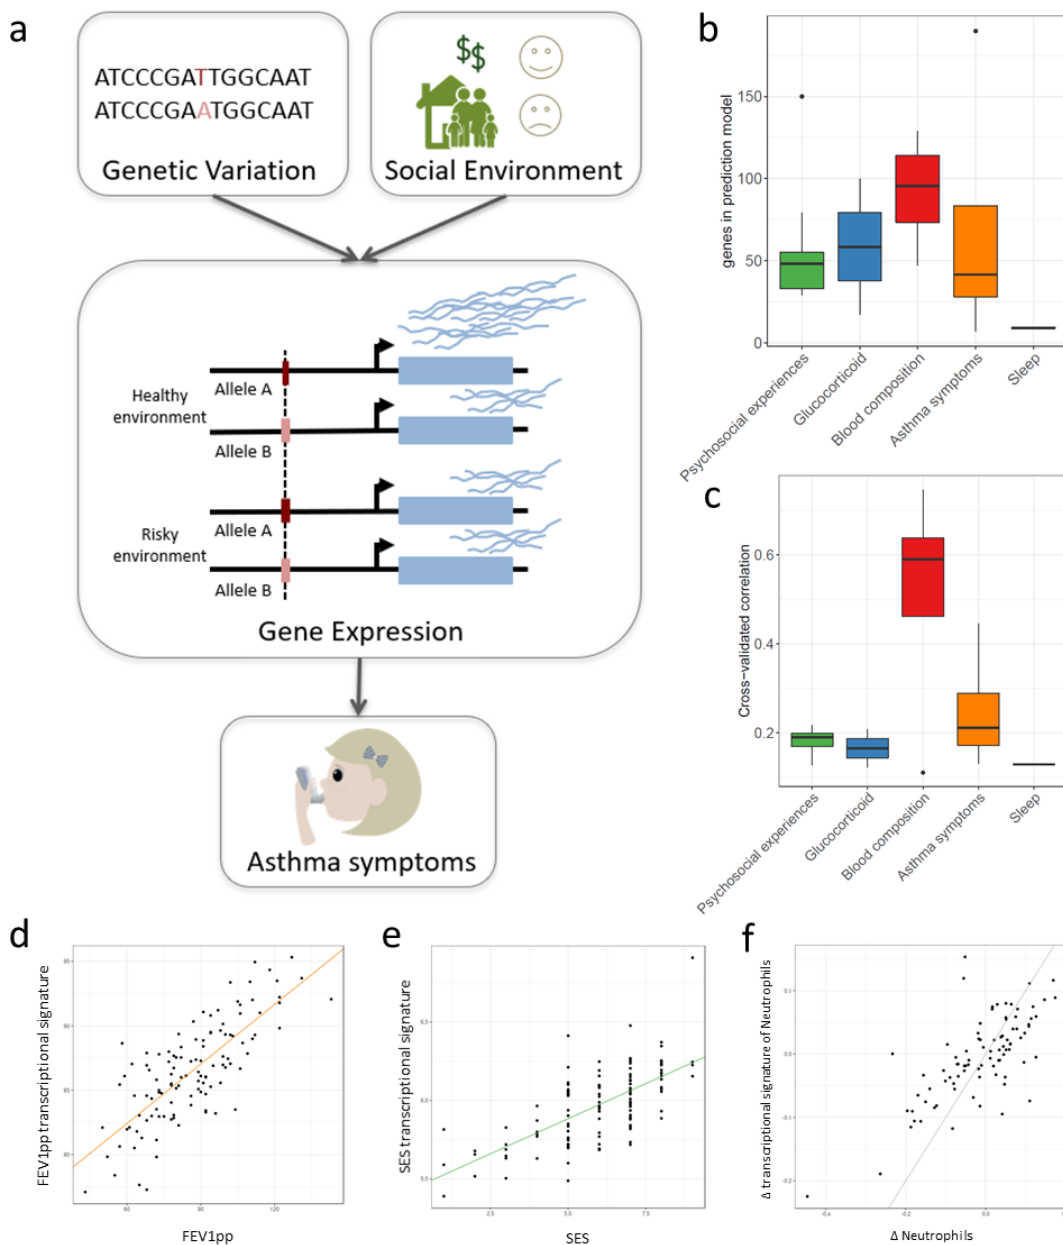

**Fig. 1. a** - Central hypothesis, **b** - Number of genes in elastic net regression models that explain at least 1% of variance. Colors represent different categories of variables. **c** - Cross-validated correlation between transcriptional signatures and measured variables for elastic net regression models that explain at least 1% of variance, **d** - Forced Expiratory Volume percent predicted transcriptional signature model fit (Pearson's  $\rho=0.76$ ,  $p<0.001$ ), **e** - Socioeconomic status transcriptional signature model fit (Pearson's  $\rho=0.67$ ,  $p<0.001$ ), **f** - Longitudinal change in observed Neutrophils (x axis) and longitudinal change in transcriptional signature of Neutrophils (y axis) (Pearson's  $\rho=0.72$ ,  $p<0.001$ , grey=identity line).



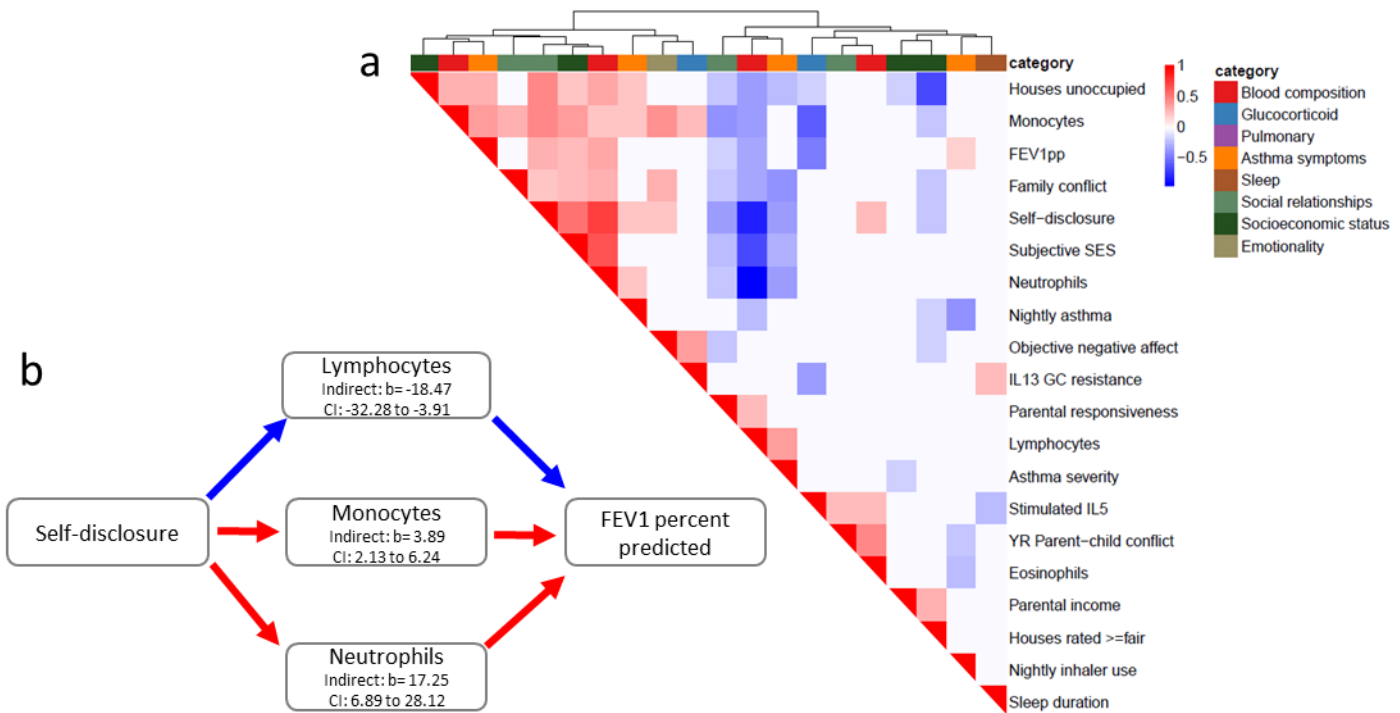

**Fig. 2. a** - Heatmap of correlations between transcriptional signatures of variables explaining at least 1% of variance. Heatmap color indicates strength and direction of correlation; white indicates  $p\text{-value} > 0.05$ . Hierarchical clustering of variables is represented above the heatmap, with colors indicating categories for each variable as indicated in the legend. **b** - Mediation analysis between transcriptional signatures of self-disclosure and percent-predicted FEV1, through transcriptional signatures of cell composition.



**Fig. 3. a** - Number of significant interaction eQTLs (at 10% FDR) for each blood composition trait or psychosocial experience, **b** - Network of interactions between environments and eGenes. Each node represents an eGene with an interaction eQTL (black) or a variable that modulates the genetic effect on gene expression. Only nodes with at least two interactions are labelled. Edges represent significant interaction eQTLs (10% FDR), **c** and **d** - Causal gene-complex trait interactions identified through TWAS are modulated by psychosocial experiences. Psychosocial variables (c) or blood composition (d) are in the left column, eGenes in the central column and complex traits in the right column. A connecting line represents either a causal link between eGene and asthma or allergic disease trait identified through TWAS (middle to right) or a significant interaction eQTL (left to middle). **e** and **f** - Examples of genes causally associated with asthma and with GxE effects that modulate genetic risk. Both genes are causally associated with asthma in TWAS. Each dot is an individual. The boxplot in the inset represents normalized gene expression for the same genes across the three tertiles of the relevant psychosocial variable.

## Methods

**Study participants.** Participants were included from an ongoing longitudinal study, Asthma in the Lives of Families Today (ALOFT; recruited from November 2010-July 2018, Wayne State University Institutional Review Board approval #0412110B3F). The ALOFT study investigates links between family dynamics, biological changes, and asthma morbidity among youth from the Detroit metropolitan area. Participants were recruited from local area hospitals and schools (for recruitment details see Supplemental text). To be included in the study, youth were required to be between 10 and 15 years of age at the time of recruitment and diagnosed with at least mild to persistent asthma by a physician (with diagnosis confirmed from medical records). Youth were screened for medical conditions and medications that might affect asthma and associated biological markers. The full sample included 297 youth and their primary caregivers (typically mothers, referred to as "parent" below). However, only youth with valid gene expression data were included in this investigation. Thus, the sample was comprised of 251 youth (148 boys and 103 girls), whose average age was 12.89 years old ( $sd=1.77$  years), and at least one parent. Psychosocial and biological variables, including asthma measures, were available for a subset of 119 participants. For a subset of up to 103 participants we have collected longitudinal data (either 1- or 2-year follow up), which we used to validate the transcriptional signatures. Basic demographic information on these participants is included in Table S1.

**Participant recruitment and collection of psychosocial and biological variables.** The parent completed a telephone screening interview to determine eligibility in the study. Written assent and consent were obtained from the participating youth and their parent, respectively.

**In-lab assessments.** The participating youth and parent visited the laboratory, where they completed background questionnaires on a computer and individual interviews assessing stress and asthma management. Parents reported demographics, including their annual income and education level, and completed measures of subjective socioeconomic status (the McArthur ladder <sup>60</sup>), neighborhood stress <sup>61</sup>, conflict with their child (the Parental Environment Questionnaire <sup>62</sup>), and depressive symptoms (the CES-D <sup>63</sup>). The zip code for each family was also collected and used to retrieve objective measures of neighborhood quality based on census block data from 2010 and Data Driven Detroit (collected in 2009), including the percentage of houses rated as fair in quality or better, percentage of houses currently unoccupied, and the percent of people in that area living below the poverty line.

At the same time, youth reported on demographics, warmth received from their mother (Parental Behavior Inventory <sup>64</sup>), conflict with their mother, the quality of their family environment (the Risky

Families Questionnaire<sup>65,66</sup>), depressive symptoms (the Child Depression Inventory<sup>67</sup>), and the frequency and severity of their asthma symptoms (the Teen Asthma History). Youth also reported on their parents smoking inside the household. However, due to low prevalence as well as uncertainty on whether the parents were present in the household during the four days of data collection, we decided to not use this information in our analyses. They also completed a spirometry test using the nSpire Health KoKo PFT, to obtain the following pulmonary measures: FEV1 percent predicted, FVC percent predicted, FEV1/FVC percent predicted. Also at this visit, the youth and parent were given detailed instructions regarding a four-day daily assessment period. The laboratory visit lasted approximately two hours.

In-home assessments. For four days following the laboratory visit (2 weekdays and 2 weekend days), youth and their parent completed daily assessments. Both youth and their parent completed daily diaries each evening about their experiences throughout their day, and sleep diaries each morning about the quality of their sleep. Daily diaries contained items assessing their positive (i.e., happy, interested, excited, and proud) and negative (i.e., sad, angry, upset, worried, distressed) affect, and how much affection and conflict they witnessed between their parents. Youth were also asked to think about the most important and meaningful conversation they had with someone that day, and the extent to which they talked about their thoughts and feelings during that conversation (to measure self-disclosure), and how understanding, validating, and caring their conversation partner was (to measure perceived responsiveness). The sleep diaries contained the Pittsburgh Sleep Scale<sup>68</sup>, which assesses sleep latency (how long to fall asleep), sleep efficiency (how much time in bed spent sleeping), the number of awakenings throughout the night, the total duration of sleep in hours, and the quality of the sleep. Through the daily and sleep diaries the participants provided information on the following measures of asthma: severity and frequency of daily and nightly asthma symptoms (wheezing, shortness of breath, coughing, chest tightness, other) and nightly inhaler use. Description of daily diary and sleep diary items used in this investigation is included in Supplemental file 1. When youth completed the daily and sleep diaries (i.e., at awakening and before bed), they used a peak flow meter twice to measure peak flow, with the best score between the two assessments used as our measure of morning and evening peak flow. Only daily and sleep diary reports from youth are used in this investigation. Additionally, youth provided four samples of saliva daily for four days at wakeup, 30 minutes after wakeup, before dinner, and immediately before bed using passive drool methods. Sample time was recorded by participant report, time stamps, and MEMS 6 TrackCap monitors (Aardex Ltd., Switzerland). Samples were initially stored in participants' refrigerators, but upon return to the lab, saliva samples were stored in the laboratory refrigerator at -20°C until assayed. To reduce positive

skewness, we natural log transformed the cortisol values (raw cortisol +1). Hierarchical linear models were run in HLM to extract the average diurnal cortisol intercept, slope, and cortisol awakening response (CAR) for each participant. Finally, participants wore the Electronically Activated Recorder (EAR) in their front pocket or in a belt clip provided from the time they woke up until bedtime. The EAR captured 50 seconds of sound every nine minutes<sup>69</sup>. EAR data were coded by trained coders using the Everyday Child Home Observation (ECHO) coding system<sup>70</sup>. Specifically, for this investigation, we use codes of wheezing, positive affect (i.e., happy, interested, excited), negative affect (i.e., sadness, anger, upset, worry, distress), maternal responsiveness (i.e., how much the mother expresses pride, support, and warmth towards the youth), and family conflict (i.e., whether an argument, conflict, fight, or yelling was overheard). Scores for each EAR-observed behavior reflect a mean of the total recordings in which the behavior was observed during waking hours. After completion of the in-home assessment period, the participants returned study materials and the EAR. Youth and parents were compensated for their time.

Additional details on the measures collected in-home are provided in File S1. Descriptive and reliability statistics can be found in Supplemental Table S2. Correlations between measures can be found in Supplemental Figure S1.

**Biological sample collection.** Following the daily assessment period, a peripheral blood draw was conducted for each youth participant. Each youth provided 16, 4 and 8 ml of peripheral blood collected into Vacutainer Cell Preparation Tubes (Becton Dickinson and Co., East Rutherford, NJ) for PBMC (FICOLL gradient vacutainers), DNA (sodium citrate vacutainer, Fisher Scientific catalog #BD-366415) and RNA (EDTA vacutainer) extraction, respectively. Peripheral blood mononuclear cells (PBMCs) were extracted from this sample, as previously described (66). All PBMC samples were phenotyped for glucocorticoid (GC) resistance in an in vitro assay measuring the levels of IL-5, IL-13 and IFN- $\gamma$  in the supernatant (Quantikine ELISA D5000B, D1300B and DIF-50, R&D Systems, Minneapolis, MN). Specifically, PBMCs cultured in RPMI-1640 solution (Life Technologies, Carlsbad, CA) supplemented with 10% FBS (Life Technologies) and 2% HEPES (Sigma-Aldrich, St. Louis, MO) were stimulated for 48 hours with PMA+ionomycin (phorbolmyristate acetate 25 ng/ml, Fisher Scientific, Hanover, IL; ionomycin calcium salt, 1  $\mu$ g/ml, Sigma-Aldrich, St. Louis, MO) and treated with hydrocortisone (28 nmol/l, Sigma-Aldrich, St. Louis, MO) or vehicle control. GC resistance was calculated as log-fold change of cytokine level in hydrocortisone condition over control and averaged over two replicates. DNA was extracted using DNA Blood Mini Kit (Qiagen, Germantown, MD), and RNA was extracted using LeukoLOCK™ Total RNA Isolation System (Thermo Fisher Scientific, Waltham, MA).



Each of the aforementioned measures were collected annually for a period of two years (three data collection waves) from participants who provided continued informed consent.

**Genotype data.** All individuals in this study were genotyped from low-coverage (~0.1X) whole-genome sequencing and imputed to 37.5 M variants using the 1000 Genomes database by Gencove (New York, NY). This data were used for sample quality control (see: Ancestry QC, sex QC and Genotype QC) and to calculate the top three PCs to use as covariates in all statistical analyses.

**Genotype QC.** To detect potential sample swaps that may have occurred in sample processing or library preparation, we compared genotypes of RNA and DNA samples from all individuals. We used samtools mpileup function to obtain genotypes from each individual's RNA-seq bam files for NCBI dbSNP Build 144 variants and kept only variants with more than 40 reads coverage. We used bcftools gtcheck function to compare genotype calls across all biallelic SNPs in all DNA and RNA samples. RNA samples that failed to cluster with their respective DNA sample were repeated (library preparation and sequencing). If the discrepancy was not resolved these samples were excluded from the analysis. A total of 251 samples passed this QC filter. In the end, the pairwise error rate between genotype calls from RNA and their respective DNA samples from the same individual ranged between 0.03 and 0.12. In contrast, the pairwise error rate between all the other unrelated samples ranged from 0.2 to 0.33.

We also used the DNA-derived genotype information to confirm none of the participants were related. We performed Identity-By-Descent (IBD) analysis by Maximum Likelihood Estimation (MLE) using the R package SNPRelate (version 1.16.0). As input we used random 1500 SNPs passing the following criteria: MAF>0.05, missing rate<0.05, LD threshold<0.2. (Fig. S3).

**Ancestry and sex QC.** For the 119 individuals for whom the data was available, we plotted self-reported ethnicity against percent global African ancestry defined as the sum of West, East, Central and North African global genetic ancestries calculated by Gencove (Fig. S2a). All samples were in agreement with self-reported ethnicity. Three participants who identified as Multiracial were found to be of admixed African American and Caucasian ancestry based on genotype analysis provided by Gencove. To check consistency of self-reported sex against genetic data, we plotted fraction of reads mapping to the Y chromosome for all samples. We noted a clear separation between the sexes with no outliers (Fig. S2b).



**RNA-seq data collection and pre-processing.** Total RNA was extracted from leukocytes collected on LeukoLOCK (Thermo Fisher) and preserved at  $-80^{\circ}\text{C}$ . All RNA samples had a RIN of at least 6 measured on Agilent Bioanalyzer. Library preparation was performed in batches of up to 96 samples (with multiple samples from the same participant always processed within the same batch) on 1-4 ug total RNA, per standard Illumina TruSeq Stranded mRNA library preparation protocol, and sequenced on Illumina NextSeq500 to a depth of 21 million (M) to 76M reads, mean 41M reads (150 bp paired-end). HISAT2<sup>71</sup> was used to align demultiplexed reads to the human genome version "GRCh37\_snp\_tran", which considers splicing and common genetic variants. Aligned and cleaned (deduplicated) reads were counted using HTSeq and GRCh37.75 transcriptome assembly across 63,677 genes. Post-sequencing quality control included removal of samples with excess PCR duplicate rate ( $>60\%$ ), and genotype QC check against respective DNA sample. For all gene expression analyses, genes on sex chromosomes and genes with expression below 6 reads or 0.1 counts per million in at least 20% of samples were dropped. The final RNA-seq dataset consists of 251 unique samples and 18,904 genes.

**Differential gene expression analysis.** We used DESeq2 v1.22.1<sup>72</sup> to test for differential gene expression across the 23 psychosocial experiences using a likelihood ratio test (LRT) in 119 individuals from the first wave of data collection. To adjust for potential confounders we included as covariates the 3 top PCs of a matrix of possible confounders that included: RIN, site of RNA extraction, library preparation batch, percent reads mapping to exons, percent non-duplicate reads, age, sex, height, weight, top 3 genotype PCs and the four transcriptional signatures of blood composition, Fig. S4). Many of these confounders are very correlated and the 3 top PCs explained 99.7% of their variance. Table S3 represents correlations between individual covariates and the three top PCs of the covariate matrix. In short, PC1-PC3 largely represent weight, height, and age, respectively. For each tested variable, the LRT is then used to compare between two models:  $\text{GE} \sim \text{cvPC1} + \text{cvPC2} + \text{cvPC3} + \text{tested\_variable}$  (full model) (full model) and  $\text{GE} \sim \text{cvPC1} + \text{cvPC2} + \text{cvPC3}$  (reduced model). To control for FDR we used the default independent filtering step and multiple test correction implemented in DESeq2. Table S5 lists differentially expressed genes at 10% FDR; supplementary file S2 contains the full results of the analysis. To compare genes differentially expressed across psychosocial experiences we used PCA analysis using the *irlba* v. 2.3.2 package in R/3.5.2 on z-scores ( $\log_2$  fold-change/SE ( $\log_2$  fold-change)) for the top 50 genes with lowest p-value for each tested variable (Fig. S6).

**GO and pathway enrichment analyses.** We used the R package *clusterProfiler*<sup>73</sup> to run GO, KEGG and REACTOME enrichment analyses (hypergeometric test) across genes upregulated and downregulated compared to the background of all expressed genes (Fig. S5). Enriched categories were defined at 5% FDR.

**Imputation and de-noising of transcriptional signatures.** We developed an approach to impute and de-noise a transcriptional signature for psychosocial, environmental and other phenotypic variables based on Generalized Linear Models with Elastic-Net Regularization. First, we normalized the count data using the voom function in the *limma* v3.38.3 package in R<sup>74</sup>. Second, we regressed out the following confounding factors: RIN, percent reads mapping to exons, percent non-duplicate reads, site of RNA extraction, library preparation batch, sample collection wave, age, sex, height, weight, genotype PC1, genotype PC2, genotype PC3. Third, we used the R package *glmnet* v2.0-16 in R/3.5.2 (gaussian model), with a relaxed  $\alpha=0.1$  to allow for highly co-regulated genes to be included in the prediction model. Leave-one-out cross-validation was used to evaluate the best models. We used the cross-validated mean square error (MSE) metric, and its standard deviation to evaluate which signatures were more predictive. We calculated the  $R^2$  for each of the models based on the % MSE reduction from cross validation. To compare the results that would be achievable with the CTRA-based approach, we used the same method but we limited the molecular signature to only include the 53 genes that are used to calculate the CTRA score<sup>35</sup>. 48 of the 53 genes comprising the CTRA are measurable in our sample (CTRA genes below detection: IL1A, IFIT1L, IFITM5, IFNB1, IGLL3). We compared the fraction of variance explained between the CTRA-based and unrestricted models (Fig. S8).

**Longitudinal Replication.** We collected a second time-point (approximately one or two-years after the time point used in current analyses) for a subset of 14 variables: parental income, subjective SES, self-disclosure, YR Parent-child conflict, stimulated IL5, IL13 GC resistance, Eosinophils, Lymphocytes, Monocytes, Neutrophils, FEV1 percent predicted, nightly asthma symptoms, nightly inhaler use and asthma severity, to validate the transcriptional signatures. We considered the longitudinal changes in the transcriptional signatures imputed from the new gene expression data and compared them to the changes in the observed variable between the two time points. Note that the transcriptional signature is imputed for the second time point from gene expression samples that are not included in the training set. We used Spearman correlation to compare the changes from the imputed transcriptional signature to those directly observed.

**Mediation analyses.** To test whether transcriptional changes associated with blood composition (Proportion of Basophils, Lymphocytes, Monocytes and Neutrophils) mediated the observed correlations between psychosocial experiences (self-disclosure) and asthma outcomes (percent-predicted FEV), we used the PROCESS macro in SPSS<sup>75</sup> to conduct indirect effect analyses on transcriptional signatures (basic mediation, Model 4, testing the indirect path from independent variable X to mediator M to dependent variable Y) using a bootstrapping approach with 20,000 iterations. The indirect path was considered to be significant if the confidence interval produced by this test did not include 0 for 95% of the iterations.

**cis-eQTL mapping.** We calculated gene expression residuals (as in the imputation and denoising approach) and then used FastQTL<sup>76</sup> with adaptive permutations (1,000-10,000). For each gene, we tested all genetic variants within 1 Mb of the transcription start site (TSS) and with cohort minor allele frequency (MAF)>0.1, for a total of 17,679 genes and 82,679,170 variant-gene pairs tested. We optimized the number of gene expression PCs in the model to maximize the number of eGenes. The model that yielded the largest number of eGenes included 18 gene expression PCs (File S4b).

**Interaction eQTL mapping.** To identify interaction eQTLs, we considered the lead eQTL for each of the 4943 eGenes identified at 10% FDR by FastQTL (without correcting for gene expression principal components). This is similar to what was done by GTEx<sup>55</sup> and others<sup>77,78</sup>, and equivalent to a very conservative pruning of all SNPs in the entire cis-association region. This is similar to what was done by GTEx (Kim-Hellmuth et al. 2019) and others (Alasoo et al. 2018; Kim-Hellmuth et al. 2017), and equivalent to a very conservative pruning of all SNPs in the entire cis-association region. We did not correct for gene expression principal components because some of them are correlated with cell-composition and the environmental variables, thus complicating the interpretation of the linear model. To reduce impact of potential outliers, we quantile-normalized each transcriptional signature prior to GxE testing. We fit a linear model that includes both the genotype dosage and the marginal environmental effect as well as their interaction: Expression ~ dosage + transcriptional signature + dosage\*transcriptional signature. To fit this model we used the lm function in R-3.5.2. We generated an empirical null distribution of 100 million permuted p-values to correct the interaction p-values (Fig. S9). The empirical null distribution was obtained through multiple runs of the model for each tested transcriptional signature-gene pair while permuting the genotype dosages. Storey's q-value method to control

for FDR was applied on the permutation-corrected p-values for all tests within each transcriptional signature separately.

To ensure the signal detected was not solely due to cell composition differences, we repeated the GxE eQTL mapping procedure as above, while correcting for four signatures of cell composition using the following model: Expression ~ Eosinophils + Leukocytes + Monocytes + Neutrophils + dosage + transcriptional signature + dosage\*transcriptional signature. Supplementary File S6 contains full results of this analysis.

**Replication analysis of GxE.** To validate our GxE results we considered the following GxE studies for which full interaction testing results are available<sup>55-59,79</sup>. We show numbers of our GxE eGenes (FDR<10%) which replicated in other studies (p-value<0.05).

**TWAS analyses.** To directly investigate whether discovered effects on gene expression and GxE interactions may contribute to asthma, allergic disease risk and/or behavioral phenotypes, we used PTWAS results<sup>53</sup> (5% FDR) as an independent source of evidence of causality between gene expression levels and asthma/allergic disease risk (File S5). PTWAS utilizes probabilistic eQTL annotations derived from multi-variant Bayesian fine-mapping analysis conferring higher power to detect TWAS associations than existing methods. The evidence for causality from PTWAS is strong for the following reasons: i) we use only strong instrumental variables (IVs) by combining the strength of multiple independent strong eQTLs for each gene and combining information across all tissues; ii) within the PTWAS framework we can then validate the causality assumption for each gene-trait-tissue combination. We found that the exclusion restriction criterion was violated (heterogeneity of independent estimates across multiple strong eQTLs,  $I^2$  statistic>0.5) in only 0.36% of the gene-trait pairs for which we computed this statistic, none of which overlap our reported results. Using eQTL data across 49 tissues from GTEx v8, we used PTWAS to analyze GWAS summary statistics from several large-scale projects. Here, we specifically focused on the following asthma studies: GABRIEL-Asthma, TAGC-Asthma-EUR, UKB-20002-1111-self-reported-asthma, UKB-6152-8-diagnosed-by-doctor-Asthma, and allergic disease studies: EAGLE-Eczema, UKB-20002-1452-self-reported-eczema-or-dermatitis, UKB-6152-9-diagnosed-by-doctor-Hayfever-allergic-rhinitis-or-eczema. Additionally we considered other phenotypes that may be relevant for our cohort: chronotype (Jones-et-al-2016-Chronotype, UKB-1180-Morning-or-evening-person-chronotype), sleep duration (Jones-et-al-2016-SleepDuration, UKB-1160-Sleep-duration), and depressive symptoms (SSGAC-Depressive-Symptoms). To identify eGenes in asthmatic children that are causally associated with asthma,

we considered all 4,943 eGenes that were used for the interaction eQTL analysis with a significant (10% FDR) marginal effect of the psychosocial experiences from the linear model that includes both the genotype dosage and the marginal environmental effect as well as their interaction: Expression ~ dosage + transcriptional signature + dosage\*transcriptional signature.

**Data availability.** The data are being submitted to dbGAP. Accession number is pending.

## References:

1. Miller, G., Chen, E. & Cole, S. W. Health psychology: developing biologically plausible models linking the social world and physical health. *Annu. Rev. Psychol.* **60**, 501–524 (2009).
2. Pressman, S. D., Jenkins, B. N. & Moskowitz, J. T. Positive Affect and Health: What Do We Know and Where Next Should We Go? *Annu. Rev. Psychol.* **70**, 627–650 (2019).
3. Smith, T. W., Glazer, K., Ruiz, J. M. & Gallo, L. C. Hostility, anger, aggressiveness, and coronary heart disease: an interpersonal perspective on personality, emotion, and health. *J. Pers.* **72**, 1217–1270 (2004).
4. Repetti, R. L., Taylor, S. E. & Seeman, T. E. Risky families: family social environments and the mental and physical health of offspring. *Psychol. Bull.* **128**, 330–366 (2002).
5. Robles, T. F., Slatcher, R. B., Trombello, J. M. & McGinn, M. M. Marital quality and health: A meta-analytic review. *Psychological Bulletin* vol. 140 140–187 (2014).
6. Gallo, L. C. & Matthews, K. A. Understanding the association between socioeconomic status and physical health: do negative emotions play a role? *Psychol. Bull.* **129**, 10–51 (2003).
7. Harrison, B. D. W. Psychosocial aspects of asthma in adults. *Thorax* vol. 53 519–525 (1998).
8. Meyer, T. J. & Mark, M. M. Effects of psychosocial interventions with adult cancer patients: a meta-analysis of randomized experiments. *Health Psychol.* **14**, 101–108 (1995).
9. Everson-Rose, S. A. & Lewis, T. T. Psychosocial factors and cardiovascular diseases. *Annu. Rev. Public Health* **26**, 469–500 (2005).
10. Holt-Lunstad, J., Smith, T. B. & Layton, J. B. Social relationships and mortality risk: a meta-analytic review. *PLoS Med.* **7**, e1000316 (2010).
11. Chida, Y. & Steptoe, A. Positive psychological well-being and mortality: a quantitative

- review of prospective observational studies. *Psychosom. Med.* **70**, 741–756 (2008).
12. Moorman, J. E. *et al.* National surveillance of asthma: United States, 2001-2010. *Vital Health Stat.* **3** 1–58 (2012).
  13. Weiss, K. B., Sullivan, S. D. & Lyttle, C. S. Trends in the cost of illness for asthma in the United States, 1985-1994. *J. Allergy Clin. Immunol.* **106**, 493–499 (2000).
  14. Akinbami, L. & Centers for Disease Control and Prevention National Center for Health Statistics. The state of childhood asthma, United States, 1980-2005. *Adv. Data* 1–24 (2006).
  15. Sullivan, S. D. *et al.* The cost-effectiveness of an inner-city asthma intervention for children. *J. Allergy Clin. Immunol.* **110**, 576–581 (2002).
  16. von Mutius, E. The environmental predictors of allergic disease. *J. Allergy Clin. Immunol.* **105**, 9–19 (2000).
  17. von Mutius, E. Gene-environment interactions in asthma. *J. Allergy Clin. Immunol.* **123**, 3–11; quiz 12–3 (2009).
  18. Umetsu, D. T., McIntire, J. J., Akbari, O., Macaubas, C. & DeKruyff, R. H. Asthma: an epidemic of dysregulated immunity. *Nat. Immunol.* **3**, 715–720 (2002).
  19. Wright, R. J., Rodriguez, M. & Cohen, S. Review of psychosocial stress and asthma: an integrated biopsychosocial approach. *Thorax* **53**, 1066–1074 (1998).
  20. Wright, R. J., Cohen, R. T. & Cohen, S. The impact of stress on the development and expression of atopy. *Curr. Opin. Allergy Clin. Immunol.* **5**, 23–29 (2005).
  21. Shankardass, K. *et al.* Parental stress increases the effect of traffic-related air pollution on childhood asthma incidence. *Proc. Natl. Acad. Sci. U. S. A.* **106**, 12406–12411 (2009).
  22. Chen, E. & Miller, G. E. Stress and inflammation in exacerbations of asthma. *Brain, Behavior, and Immunity* vol. 21 993–999 (2007).
  23. Sandberg, S. *et al.* The role of acute and chronic stress in asthma attacks in children. *Lancet* **356**, 982–987 (2000).



24. Cole, S. W. Human social genomics. *PLoS Genet.* **10**, e1004601 (2014).
25. Slavich, G. M. & Cole, S. W. The Emerging Field of Human Social Genomics. *Clinical Psychological Science* vol. 1 331–348 (2013).
26. Cole, S. W. Social Regulation of Human Gene Expression. *Current Directions in Psychological Science* vol. 18 132–137 (2009).
27. Toyokawa, S., Uddin, M., Koenen, K. C. & Galea, S. How does the social environment 'get into the mind'? Epigenetics at the intersection of social and psychiatric epidemiology. *Social Science & Medicine* vol. 74 67–74 (2012).
28. Galea, S., Uddin, M. & Koenen, K. The urban environment and mental disorders. *Epigenetics* vol. 6 400–404 (2011).
29. Chen, E. *et al.* Genome-wide transcriptional profiling linked to social class in asthma. *Thorax* **64**, 38–43 (2009).
30. Robles, T. F. *et al.* Family environments and leukocyte transcriptome indicators of a proinflammatory phenotype in children and parents. *Dev. Psychopathol.* **30**, 235–253 (2018).
31. Stanton, S. C. E. *et al.* Mothers' Attachment is Linked to Their Children's Anti-Inflammatory Gene Expression via Maternal Warmth. *Social Psychological and Personality Science* vol. 8 796–805 (2017).
32. Powell, N. D. *et al.* Social stress up-regulates inflammatory gene expression in the leukocyte transcriptome via  $\beta$ -adrenergic induction of myelopoiesis. *Proc. Natl. Acad. Sci. U. S. A.* **110**, 16574–16579 (2013).
33. Farrell, A. K. *et al.* Socioeconomic status, family negative emotional climate, and anti-inflammatory gene expression among youth with asthma. *Psychoneuroendocrinology* **91**, 62–67 (2018).
34. Segman, R. H. *et al.* Blood mononuclear cell gene expression signature of postpartum depression. *Mol. Psychiatry* **15**, 93–100, 2 (2010).

35. Fredrickson, B. L. *et al.* A functional genomic perspective on human well-being. *Proc. Natl. Acad. Sci. U. S. A.* **110**, 13684–13689 (2013).
36. Nica, A. C. *et al.* Candidate causal regulatory effects by integration of expression QTLs with complex trait genetic associations. *PLoS Genet.* **6**, e1000895 (2010).
37. Marigorta, U. M. *et al.* Transcriptional risk scores link GWAS to eQTLs and predict complications in Crohn's disease. *Nat. Genet.* **49**, 1517–1521 (2017).
38. Võsa, U. *et al.* Unraveling the polygenic architecture of complex traits using blood eQTL metaanalysis. *Genomics* 228 (2018).
39. Nica, A. C. & Dermitzakis, E. T. Using gene expression to investigate the genetic basis of complex disorders. *Hum. Mol. Genet.* **17**, R129–34 (2008).
40. Gusev, A. *et al.* Integrative approaches for large-scale transcriptome-wide association studies. *Nat. Genet.* **48**, 245–252 (2016).
41. Pividori, M., Schoettler, N., Nicolae, D. L., Ober, C. & Im, H. K. Shared and distinct genetic risk factors for childhood-onset and adult-onset asthma: genome-wide and transcriptome-wide studies. *Lancet Respir Med* **7**, 509–522 (2019).
42. Friedman, J., Hastie, T. & Tibshirani, R. Regularization Paths for Generalized Linear Models via Coordinate Descent. *Journal of Statistical Software* vol. 33 (2010).
43. Alpert, A. *et al.* A clinically meaningful metric of immune age derived from high-dimensional longitudinal monitoring. *Nat. Med.* **25**, 487–495 (2019).
44. Asgharzadeh, S. *et al.* Prognostic significance of gene expression profiles of metastatic neuroblastomas lacking MYCN gene amplification. *J. Natl. Cancer Inst.* **98**, 1193–1203 (2006).
45. Conger, R. D., Conger, K. J. & Martin, M. J. Socioeconomic Status, Family Processes, and Individual Development. *Journal of Marriage and Family* vol. 72 685–704 (2010).
46. Miller, B. D. & Wood, B. L. Emotions and family factors in childhood asthma: psychobiologic mechanisms and pathways of effect. *Adv. Psychosom. Med.* **24**, 131–160 (2003).

47. Tobin, E. T. *et al.* Asthma-Related Immune Responses in Youth With Asthma: Associations With Maternal Responsiveness and Expressions of Positive and Negative Affect in Daily Life. *Psychosom. Med.* **77**, 892–902 (2015).
48. Litonjua, A. A., Carey, V. J., Weiss, S. T. & Gold, D. R. Race, socioeconomic factors, and area of residence are associated with asthma prevalence. *Pediatr. Pulmonol.* **28**, 394–401 (1999).
49. Mielck, A., Reitmeir, P. & Wjst, M. Severity of childhood asthma by socioeconomic status. *Int. J. Epidemiol.* **25**, 388–393 (1996).
50. Lehrer, P. M., Hochron, S. M., Isenberg, S., Rausch, L. & Carr, R. The Asthma Symptom Profile: a psychophysically based scale for assessment of asthma symptoms. *J. Psychosom. Res.* **37**, 515–521 (1993).
51. Pennebaker, J. W. *Emotion, Disclosure, and Health*. (Amer Psychological Assn, 1995).
52. Aguet, F. *et al.* The GTEx Consortium atlas of genetic regulatory effects across human tissues. *Genetics* 1860 (2019).
53. Zhang, Y. *et al.* Investigating tissue-relevant causal molecular mechanisms of complex traits using probabilistic TWAS analysis. doi:10.1101/808295.
54. Zhernakova, D. V. *et al.* Identification of context-dependent expression quantitative trait loci in whole blood. *Nat. Genet.* **49**, 139–145 (2017).
55. Kim-Hellmuth, S. *et al.* Cell type specific genetic regulation of gene expression across human tissues. *Genomics* 1860 (2019).
56. Lee, M. N. *et al.* Common genetic variants modulate pathogen-sensing responses in human dendritic cells. *Science* **343**, 1246980 (2014).
57. Barreiro, L. B. *et al.* Deciphering the genetic architecture of variation in the immune response to Mycobacterium tuberculosis infection. *Proc. Natl. Acad. Sci. U. S. A.* **109**, 1204–1209 (2012).
58. Çalışkan, M., Baker, S. W., Gilad, Y. & Ober, C. Host genetic variation influences gene

- expression response to rhinovirus infection. *PLoS Genet.* **11**, e1005111 (2015).
59. Nédélec, Y. *et al.* Genetic Ancestry and Natural Selection Drive Population Differences in Immune Responses to Pathogens. *Cell* **167**, 657–669.e21 (2016).
  60. Adler, N. E., Epel, E. S., Castellazzo, G. & Ickovics, J. R. Relationship of subjective and objective social status with psychological and physiological functioning: preliminary data in healthy white women. *Health Psychol.* **19**, 586–592 (2000).
  61. Ewart, C. K. & Suchday, S. Discovering how urban poverty and violence affect health: development and validation of a Neighborhood Stress Index. *Health Psychol.* **21**, 254–262 (2002).
  62. Elkins, I. J., McGue, M. & Iacono, W. G. Genetic and environmental influences on parent-son relationships: evidence for increasing genetic influence during adolescence. *Dev. Psychol.* **33**, 351–363 (1997).
  63. Radloff, L. S. The CES-D Scale. *Applied Psychological Measurement* vol. 1 385–401 (1977).
  64. Schaefer, E. S. Children's Reports of Parental Behavior: An Inventory. *Child Development* vol. 36 413–422 (1965).
  65. Felitti, V. J. *et al.* Relationship of childhood abuse and household dysfunction to many of the leading causes of death in adults. The Adverse Childhood Experiences (ACE) Study. *Am. J. Prev. Med.* **14**, 245–258 (1998).
  66. Taylor, S. E., Lerner, J. S., Sage, R. M., Lehman, B. J. & Seeman, T. E. Early environment, emotions, responses to stress, and health. *J. Pers.* **72**, 1365–1393 (2004).
  67. Kovacs, M. *Children's Depression Inventory (CDI2): Technical Manual.* (2011).
  68. Monk, T. H. *et al.* The Pittsburgh Sleep Diary. *Journal of Sleep Research* vol. 3 111–120 (1994).
  69. Mehl, M. R., Pennebaker, J. W., Crow, D. M., Dabbs, J. & Price, J. H. The Electronically Activated Recorder (EAR): a device for sampling naturalistic daily activities and

- conversations. *Behav. Res. Methods Instrum. Comput.* **33**, 517–523 (2001).
70. Tobin, E. T. *et al.* Naturalistically observed conflict and youth asthma symptoms. *Health Psychol.* **34**, 622–631 (2015).
71. Kim, D., Langmead, B. & Salzberg, S. L. HISAT: a fast spliced aligner with low memory requirements. *Nat. Methods* **12**, 357–360 (2015).
72. Love, M. I., Huber, W. & Anders, S. Moderated estimation of fold change and dispersion for RNA-seq data with DESeq2. *Genome Biol.* **15**, 550 (2014).
73. Yu, G., Wang, L.-G., Han, Y. & He, Q.-Y. clusterProfiler: an R Package for Comparing Biological Themes Among Gene Clusters. *OMICS: A Journal of Integrative Biology* vol. 16 284–287 (2012).
74. Law, C. W., Chen, Y., Shi, W. & Smyth, G. K. voom: Precision weights unlock linear model analysis tools for RNA-seq read counts. *Genome Biol.* **15**, R29 (2014).
75. Hayes, A. F. *Introduction to Mediation, Moderation, and Conditional Process Analysis: A Regression-Based Approach*. (Guilford Publications, 2013).
76. Ongen, H., Buil, A., Brown, A. A., Dermitzakis, E. T. & Delaneau, O. Fast and efficient QTL mapper for thousands of molecular phenotypes. *Bioinformatics* **32**, 1479–1485 (2016).
77. Alasoo, K. *et al.* Shared genetic effects on chromatin and gene expression indicate a role for enhancer priming in immune response. *Nat. Genet.* **50**, 424–431 (2018).
78. Kim-Hellmuth, S. *et al.* Genetic regulatory effects modified by immune activation contribute to autoimmune disease associations. *Nat. Commun.* **8**, 266 (2017).
79. Moyerbrailean, G. A. *et al.* High-throughput allele-specific expression across 250 environmental conditions. *Genome Res.* **26**, 1627–1638 (2016).

**Acknowledgments:** We thank Luis Barreiro for comments on an earlier version of this manuscript, and members of the Luca, Pique-Regi, Zilioli and Slatcher labs for helpful discussions. We thank the study participants and their families for taking part in this study.

This work was supported by a grant from NIH NHLBI (5R01HL114097-09).

**Author contributions.** J.A.R. drafted the work, contributed to the acquisition, analysis, and interpretation of data, contributed to the creation of new software used in the work; A.K.F. substantially revised the work and contributed to the analysis and interpretation of data; H.E.M. contributed to the acquisition of data; A.A. contributed to the acquisition of data; X.W. contributed to the analysis and interpretation of data, contributed to the creation of new software used in the work; D.E.W. contributed to the acquisition of data and to the conception and design in the initial stages of this work; S.Z. contributed to the conception and design of the work, contributed to the acquisition and interpretation of data; D.E.W. contributed to the conception and design of the work; R.B.S. contributed to the conception and design of the work, contributed to the acquisition and interpretation of data; R.P. contributed to the conception and design of the work, substantially revised the work, contributed to the analysis and interpretation of data, contributed to the creation of new software used in the work; F.L. contributed to the conception and design of the work, substantially revised the work, contributed to the acquisition, analysis and interpretation of data.

**Competing interests.** The authors declare no competing interests.

**Materials & Correspondence.** All correspondence and material requests should be addressed to F.L. and R.P.

**Supplementary information and extended data:**

Materials and Methods

Figures S1-S12

Tables S1-S6

Files S1-S8
